# Supplementary material for: Genome-wide transcriptional profiling analysis reveals annexin A6 as a novel EZH2 target gene involving gastric cellular proliferation
Source: Royal Society of Chemistry journal article supplement (doi:10.1039/c5mb00233h), 2015-04-24
Supplement: c5mb00233h1.pdf [file c5mb00233h1.pdf]

## Supplementary Materials

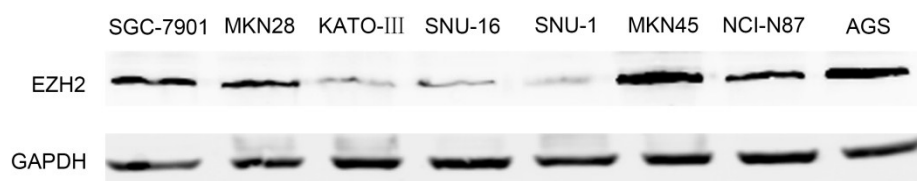

**Fig. S1** Western blot analysis of EZH2 protein expression in gastric cancer cells.

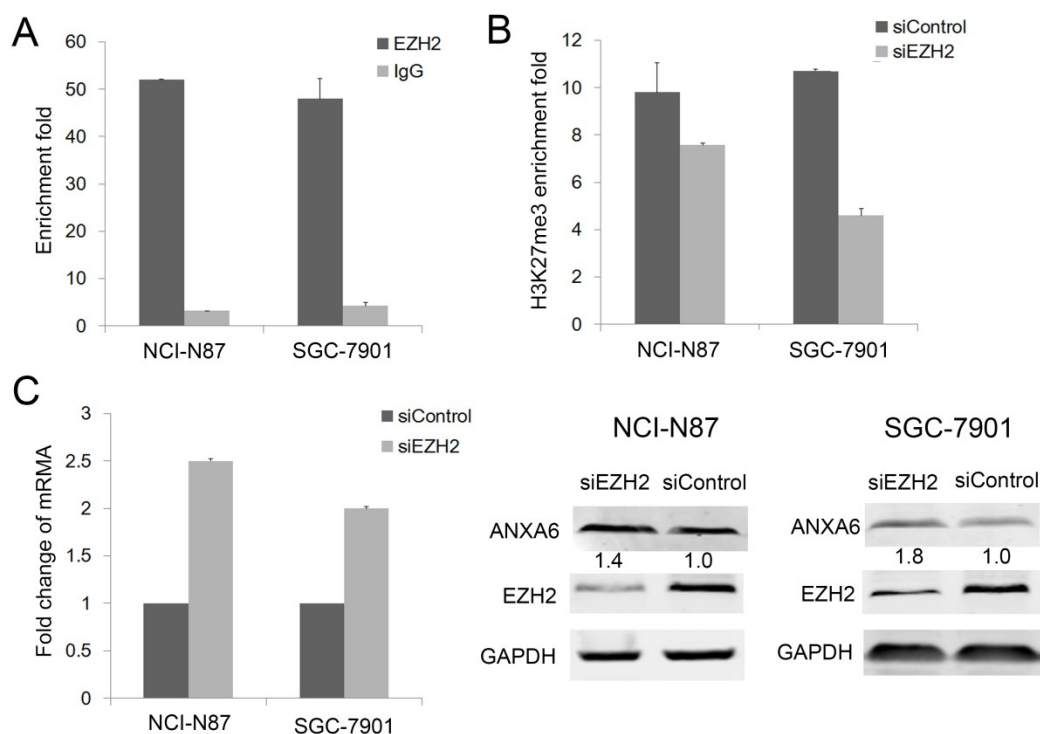

**Fig. S2** *ANXA6* is a new target of EZH2 in GC cells

(A) ChIP-qPCR analysis of EZH2 in the *ANXA6* promoter of NCI-N87 and SGC-7901. Enrichment fold was calculated as  $2^{-\Delta\Delta C_t}$  (means  $\pm$  SEM, n=3). (B) ChIP-qPCR analysis of H3K27me3 in the *ANXA6* promoter of NCI-N87 and SGC-7901 in control or GC cells transfected with siEZH2. Enrichment fold was calculated as  $2^{-\Delta\Delta C_t}$  (means  $\pm$  SEM, n=3) (C) *ANXA6* expression measured by qPCR and western blot in NCI-N87 and SGC-7901 cells upon *EZH2* knockdown. Expression of *ANXA6* was normalized to GAPDH and calculated as  $2^{-\Delta\Delta C_t}$  (means  $\pm$  SEM, n=3). Western blot

was employed to quantify the relative gray scale of each band blot by the software of Odyssey infrared imaging system. The gray scale of ANXA6 band blot in siControl was defined as 1.0.
